# Supplementary material for: Development of Phosphodiesterase–Protein-Kinase Complexes as Novel Targets for Discovery of Inhibitors with Enhanced Specificity
Source: Int J Mol Sci. 2021 May 15;22(10):5242. doi: 10.3390/ijms22105242 (PMC8156604; doi:10.3390/ijms22105242)
Supplement: Supplementary file 1 [file ijms-22-05242-s001.zip › ijms-1191812-supplementary.pdf]

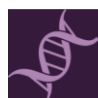

Article

# Development of Phosphodiesterase-Protein Kinase Complexes as Novel Targets for Discovery of Inhibitors with Enhanced Specificity

Nikhil K. Tulsian<sup>1,2</sup>, Valerie Jia-En Sin<sup>3</sup>, Hwee-Ling Koh<sup>3\*</sup>, Ganesh S. Anand<sup>1,4\*</sup>

<sup>1</sup> Department of Biological Sciences, 14 Science Drive 4, National University of Singapore, Singapore – 117543

<sup>2</sup> Department of Biochemistry, 28 Medical Drive, National University of Singapore, Singapore – 117546

<sup>3</sup> Department of Pharmacy, 18 Science Drive 4, National University of Singapore, Singapore – 117543

<sup>4</sup> Department of Chemistry, The Pennsylvania State University, Philadelphia, United States of America - 16801

\* Correspondence: KHL: phakohl@nus.edu.sg; Tel.: +6565167962; GSA: gsa5089@psu.edu; Tel.: 814-867-1944

## SUPPLEMENTARY INFORMATION

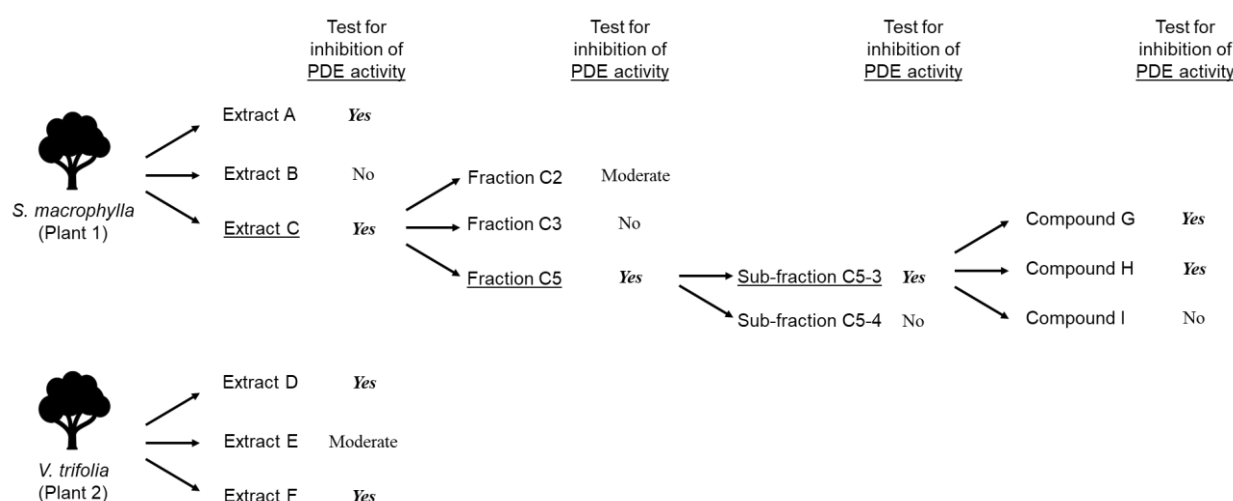

### Supplementary Figure S1: Activity-guided fractionation of plant extracts.

Schematic of extraction of compounds/fractions from two species of medicinal plants - *Swietenia macrophylla* and *Vitex trifolia*. From each plant, three crude extracts were isolated and their PDE inhibition was tested by PDE-Glo™ and FP assays. Each of the active/inhibitory fractions were then subjected to another round of fractionation and activity measurement. Qualitative results of activity assay are shown and the extracts/fractions selected for sub-fractionation are underlined.

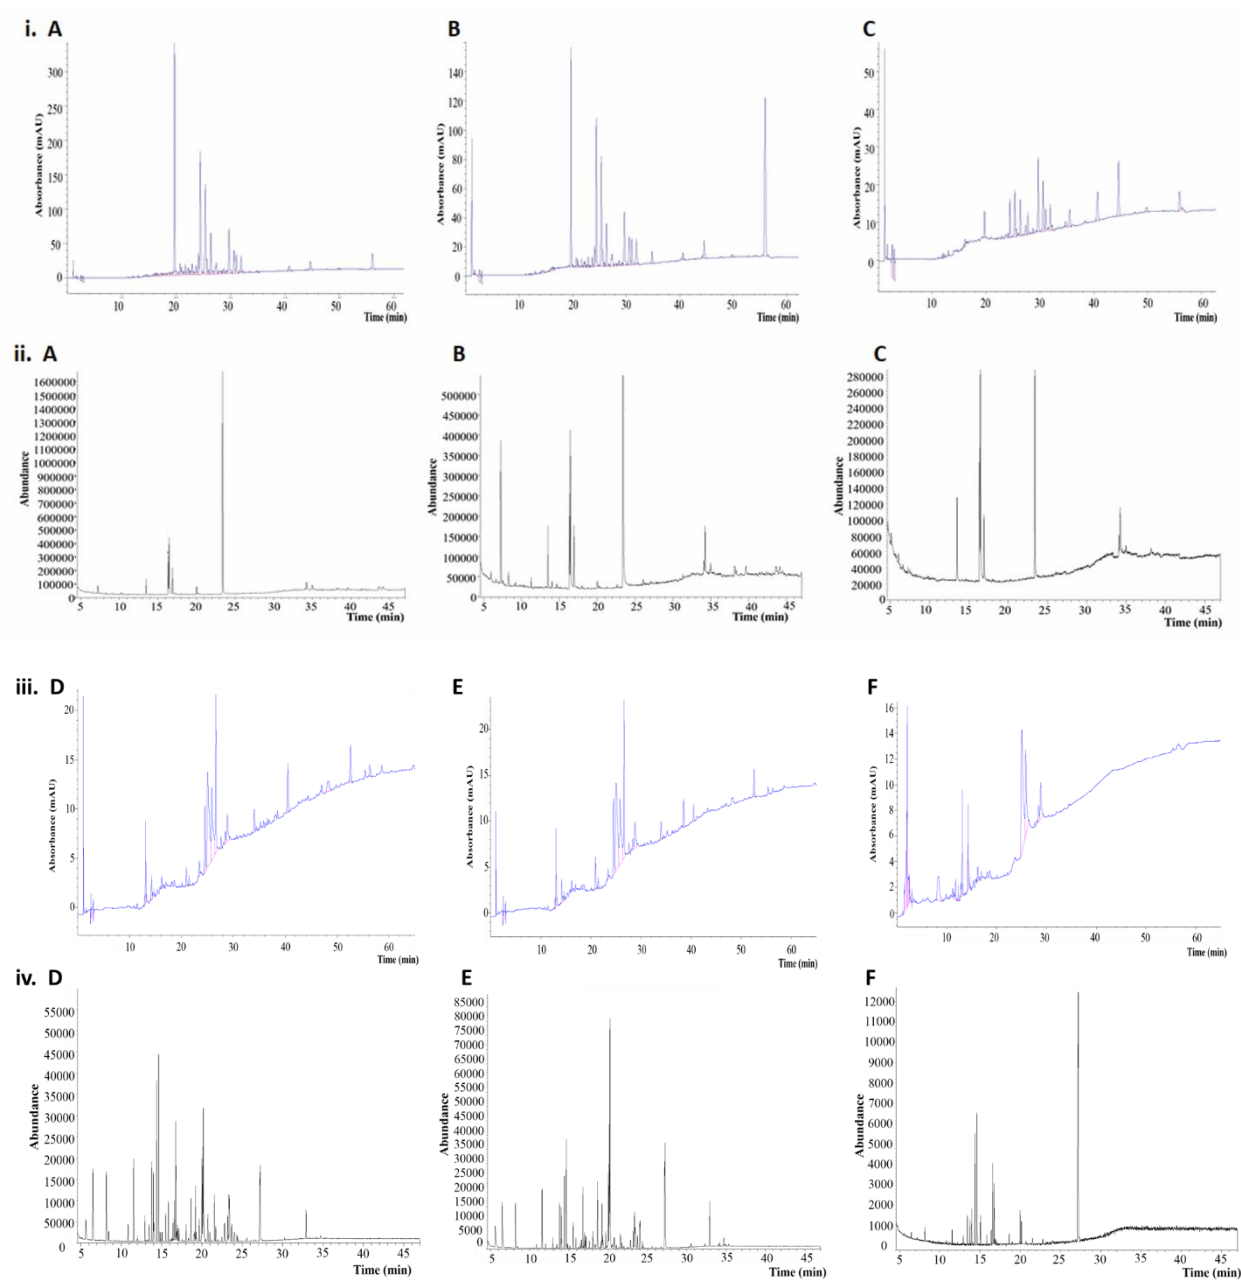

**Supplementary Figure S2: Determining chemical composition of the crude extracts by HPLC and GC-MS.** Representative ultraviolet absorbance traces (blue curves) determined by HPLC (i, iii) and their corresponding total-ion chromatograms (black curves) detected by GC-MS (ii, iv) are shown for extracts from (i, ii) *S. macrophylla* (extracts A-C) and (iii, iv) *V. trifolia* (extracts D-F). Peak fractions from HPLC were collected and then subjected to GC-MS as described in methods and Supplementary Table S1.

**Supplementary Table S1:** Summary of chemical composition determined by HPLC and GC-MS profiles of the six crude extracts dissolved in specific solvents.

| Plant                 | Extract | Solvent         | Classes of chemical compounds obtained       |
|-----------------------|---------|-----------------|----------------------------------------------|
| <i>S. macrophylla</i> | A       | Ethanol, Water  | Phenolics, methyl esters, lipids             |
|                       | B       | Water           | Limonoids, Fatty acids                       |
|                       | C       | Ethyl Acetate   | Fatty acids and derivatives, Flavonoids      |
| <i>V. trifolia</i>    | D       | Methanol, Water | Alkyl compounds, Terpenes,                   |
|                       | E       | Ethanol, Water  | Fatty acids, lignans, amino acid derivatives |
|                       | F       | Methanol, Water | Esters of fatty acids, Glycosides            |

**Supplementary Table S2:** Summary of fluorescence polarization experiments performed for PDE8-PKAR, PDE5-PKG and RegA-RD systems, indicating the details of components added to the reaction mixtures at various time intervals.**Experiment 1: Designing the PDE-PK complex as target (related to Figure 1)**

|          | Initial components<br>at 0 min | Component added at 20<br>min | Purpose                                 |
|----------|--------------------------------|------------------------------|-----------------------------------------|
| PDE8-PKA | 2fc-PKAR                       | PDE8c                        | Complexation                            |
|          |                                | PDE8c + cAMP                 | Substrate (cAMP) hydrolysis             |
| PDE5-PKG | 2fg-PKG                        | cGMP                         | Competition with substrate              |
|          |                                | PDE5                         | Complexation                            |
| RegA-RD  | 2fc-RD                         | buffer                       | Control                                 |
|          | 2fc-RD-RegA                    | cAMP                         | Displacement by high-affinity substrate |
|          |                                | cGMP                         | Displacement by low-affinity substrate  |

**Experiment 2: Testing PDE-PK complex with known PDE-inhibitors (related to Figure 1)**

|          | Initial components<br>at 0 min | Component added at 20<br>min | Purpose                          |
|----------|--------------------------------|------------------------------|----------------------------------|
| PDE8-PKA | 2fc-PKAR                       | PDE8c + IBMX                 | Non-specific inhibitor           |
|          |                                | PDE8c + PF-049573425         | Inhibition by specific inhibitor |
| PDE5-PKG | 2fg-PKG                        | PDE5 + Sildenafil            | Inhibition by specific inhibitor |
|          |                                | PDE5 + cGMP                  | Substrate (cGMP) hydrolysis      |
| RegA-RD  | 2fc-RD-RegA                    | IBMX                         | Non-specific inhibitor           |

|               |      |                      |
|---------------|------|----------------------|
| 2fc-RD + cAMP | RegA | Substrate hydrolysis |
|---------------|------|----------------------|

### Experiment 3: Testing PDE-PK complex with plant extracts (related to Figure 2)

|                 | Initial components<br>at 0 min | Component added at 20<br>min | Purpose                                                                            |
|-----------------|--------------------------------|------------------------------|------------------------------------------------------------------------------------|
| <b>PDE8-PKA</b> | 2fc-PKAR                       | PDE8c + extract A            | Screening natural extracts for<br>inhibition of cAMP-specific PDE                  |
|                 |                                | PDE8c + extract B            |                                                                                    |
|                 |                                | PDE8c + extract D            |                                                                                    |
|                 |                                | PDE8c + extract E            |                                                                                    |
|                 |                                | PDE8c + extract F            |                                                                                    |
| <b>RegA-RD</b>  | 2fc-RD-RegA                    | extract A                    | Screening natural extracts for<br>inhibition of dual-specificity PDE-PK<br>complex |
|                 |                                | extract B                    |                                                                                    |
|                 |                                | extract D                    |                                                                                    |
|                 |                                | extract E                    |                                                                                    |
|                 |                                | extract F                    |                                                                                    |

### Experiment 3: Testing PDE-PK complex with plant extracts (related to Figure 3)

|                 | Initial components<br>at 0 min | Component added at 20<br>min            | Purpose                                                                  |
|-----------------|--------------------------------|-----------------------------------------|--------------------------------------------------------------------------|
| <b>PDE5-PKG</b> | 2fg-PKG                        | PDE5 + extract A                        | Screening natural extracts for<br>inhibition of cGMP-specific PDE        |
|                 |                                | PDE5 + extract B                        |                                                                          |
|                 |                                | PDE5 + extract C                        |                                                                          |
|                 |                                | PDE5 + extract D                        |                                                                          |
|                 |                                | PDE5 + extract E                        |                                                                          |
|                 |                                | PDE5 + extract F                        |                                                                          |
|                 | 2fg-PKG                        | PDE5 + fraction C2                      | Testing PDE inhibition by isolated<br>fractions                          |
|                 |                                | PDE5 + fraction C3                      |                                                                          |
|                 |                                | PDE5 + fraction C5                      |                                                                          |
|                 |                                | PDE5 + compound G                       | Testing PDE inhibition by<br>compounds identified from fractions         |
|                 |                                | PDE5 + compound H                       |                                                                          |
|                 |                                | PDE5 + compound I                       |                                                                          |
|                 | 2fg-PKG                        | PDE5 + sub-fraction C5-3                | Testing PDE inhibition by sub-<br>fractions                              |
|                 |                                | PDE5 + sub-fraction C5-4                |                                                                          |
|                 | 2fg-PKG                        | PDE5 + sildenafil +<br>subfraction C5-4 | Comparing PDE inhibition by sub-<br>fraction spiked with known inhibitor |

**Supplementary Table S3:** Inhibition values for extracts A-F, fractions C2-C5, and compounds G-I inhibiting PDE8 and PDE5, as determined by fluorescence polarization (FP) and PDE-Glo™ assays. Average values (n = 6) were calculated as described in methods and their standard deviations (SD) are indicated.

| <b>(i) PDE8</b> |               |                       |           |                            |           |
|-----------------|---------------|-----------------------|-----------|----------------------------|-----------|
| <b>S.No.</b>    | <b>Sample</b> | <b>%FP inhibition</b> | <b>SD</b> | <b>%PDE-Glo inhibition</b> | <b>SD</b> |
| 1               | No PDE8       | 100                   | 0.15      | 99.95                      | 0         |
| 2               | PF-04         | 95.6                  | 2.10      | 99.6                       | 0.65      |
| 3               | IBMX          | 0.24                  | 1.96      | 92.3                       | 6.4       |
| 4               | A             | 6.56                  | 0.55      | 24.7                       | 6.1       |
| 5               | B             | 32.58                 | 2.90      | 6.4                        | 9.6       |
| 6               | D             | 40.2                  | 1.05      | 99.7                       | 2.3       |
| 7               | E             | 88.56                 | 2.78      | 99.71                      | 2.60      |

  

| <b>(ii) PDE5</b> |               |                       |           |                            |           |
|------------------|---------------|-----------------------|-----------|----------------------------|-----------|
| <b>S.No.</b>     | <b>Sample</b> | <b>%FP inhibition</b> | <b>SD</b> | <b>%PDE-Glo inhibition</b> | <b>SD</b> |
| 1                | No PDE5       | 100.00                | 0.10      | 100.00                     | 0.00      |
| 2                | Sildenafil    | 96.50                 | 1.20      | 95.90                      | 2.30      |
| 3                | A             | 99.83                 | 2.50      | 92.20                      | 6.40      |
| 4                | B             | 4.96                  | 0.35      | 7.40                       | 6.10      |
| 5                | C             | 99.10                 | 3.10      | 96.80                      | 1.95      |
| 6                | D             | 75.50                 | 2.20      | 65.10                      | 9.60      |
| 7                | E             | 85.37                 | 1.62      | 85.30                      | 2.30      |
| 8                | F             | 99.83                 | 3.58      | 97.90                      | 0.65      |
| 9                | G             | 90.90                 | 2.60      | 89.12                      | 5.76      |
| 10               | H             | 82.60                 | 1.30      | 98.53                      | 1.26      |
| 11               | I             | 1.00                  | 0.07      | 4.27                       | 8.15      |
| 12               | C2            | 24.80                 | 1.37      | 44.67                      | 8.54      |
| 13               | C3            | 7.40                  | 0.13      | -12.70                     | 3.70      |
| 14               | C5            | 95.80                 | 2.80      | 95.65                      | 1.30      |
| 15               | C5-3          | 99.10                 | 3.20      | 94.40                      | 1.74      |
